# Supplementary material
Source: PubMed Central journal article supplement (PMC2174172)

Supplemental Figure 1:  
**Comparison of Cell Cycle Data**

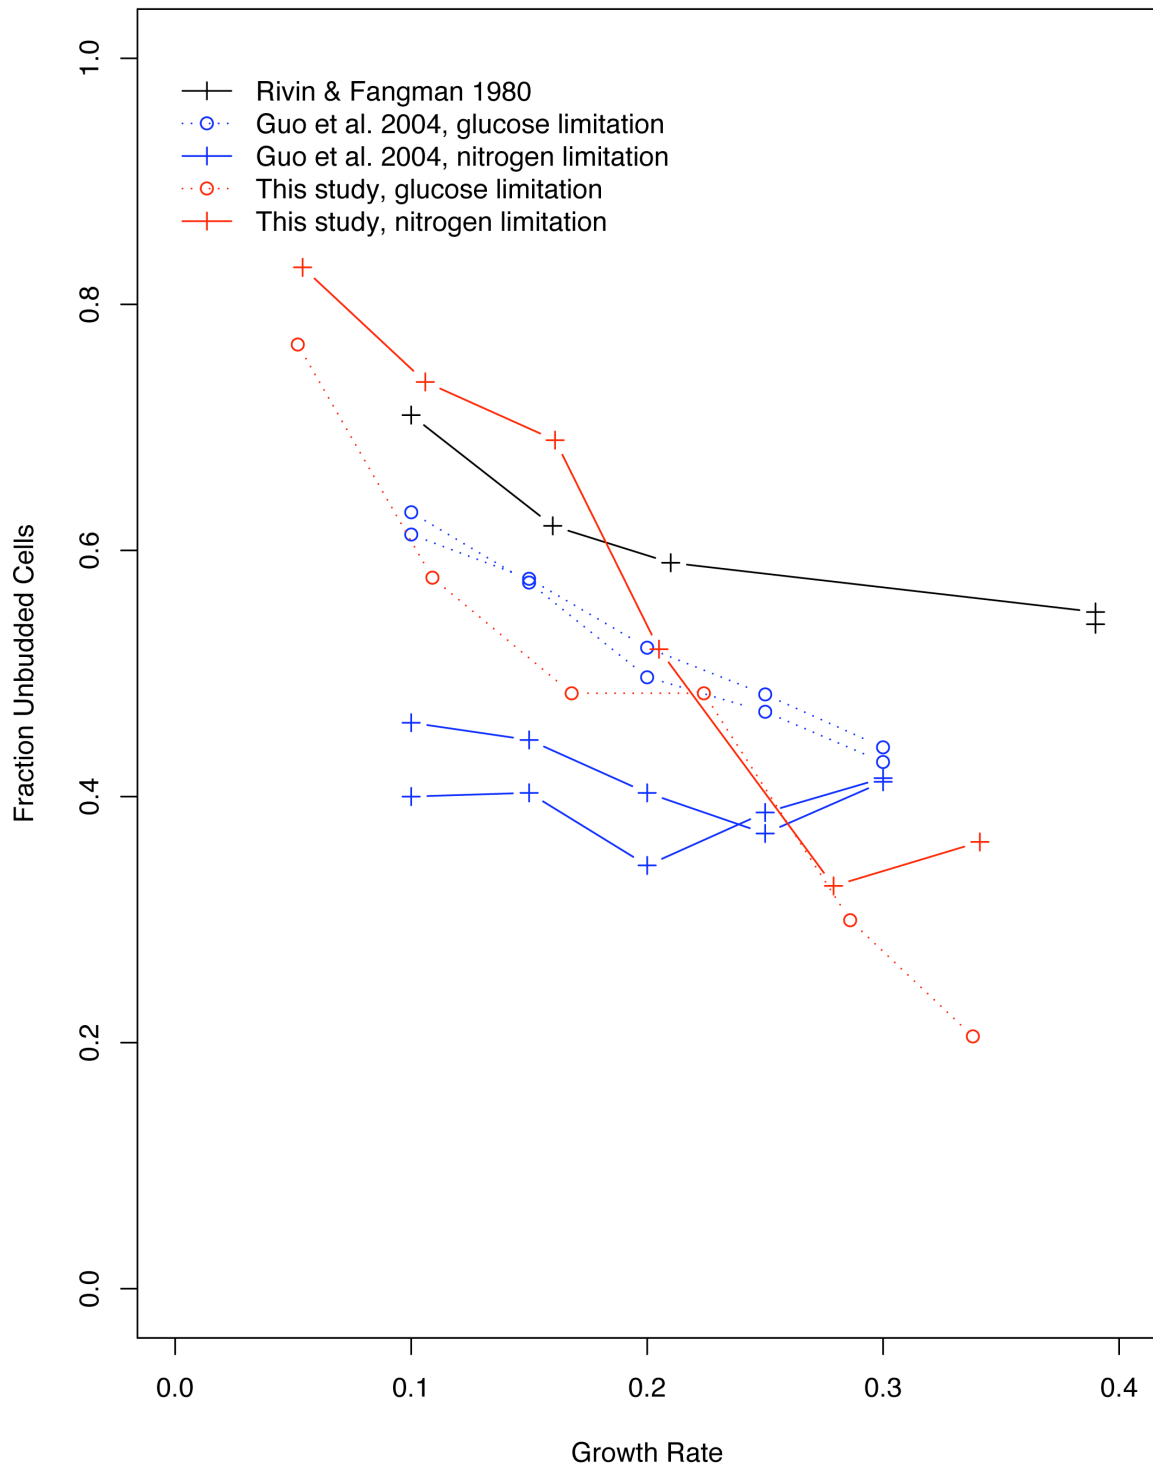

Supplement: mbc_E07-08-0779_2.pdf [file mbc_E07-08-0779_2.pdf]
