# Supplementary material
Source: PubMed Central journal article supplement (PMC2174172)

Supplemental Figure 2

**Relationship between total cell volume and culture density**

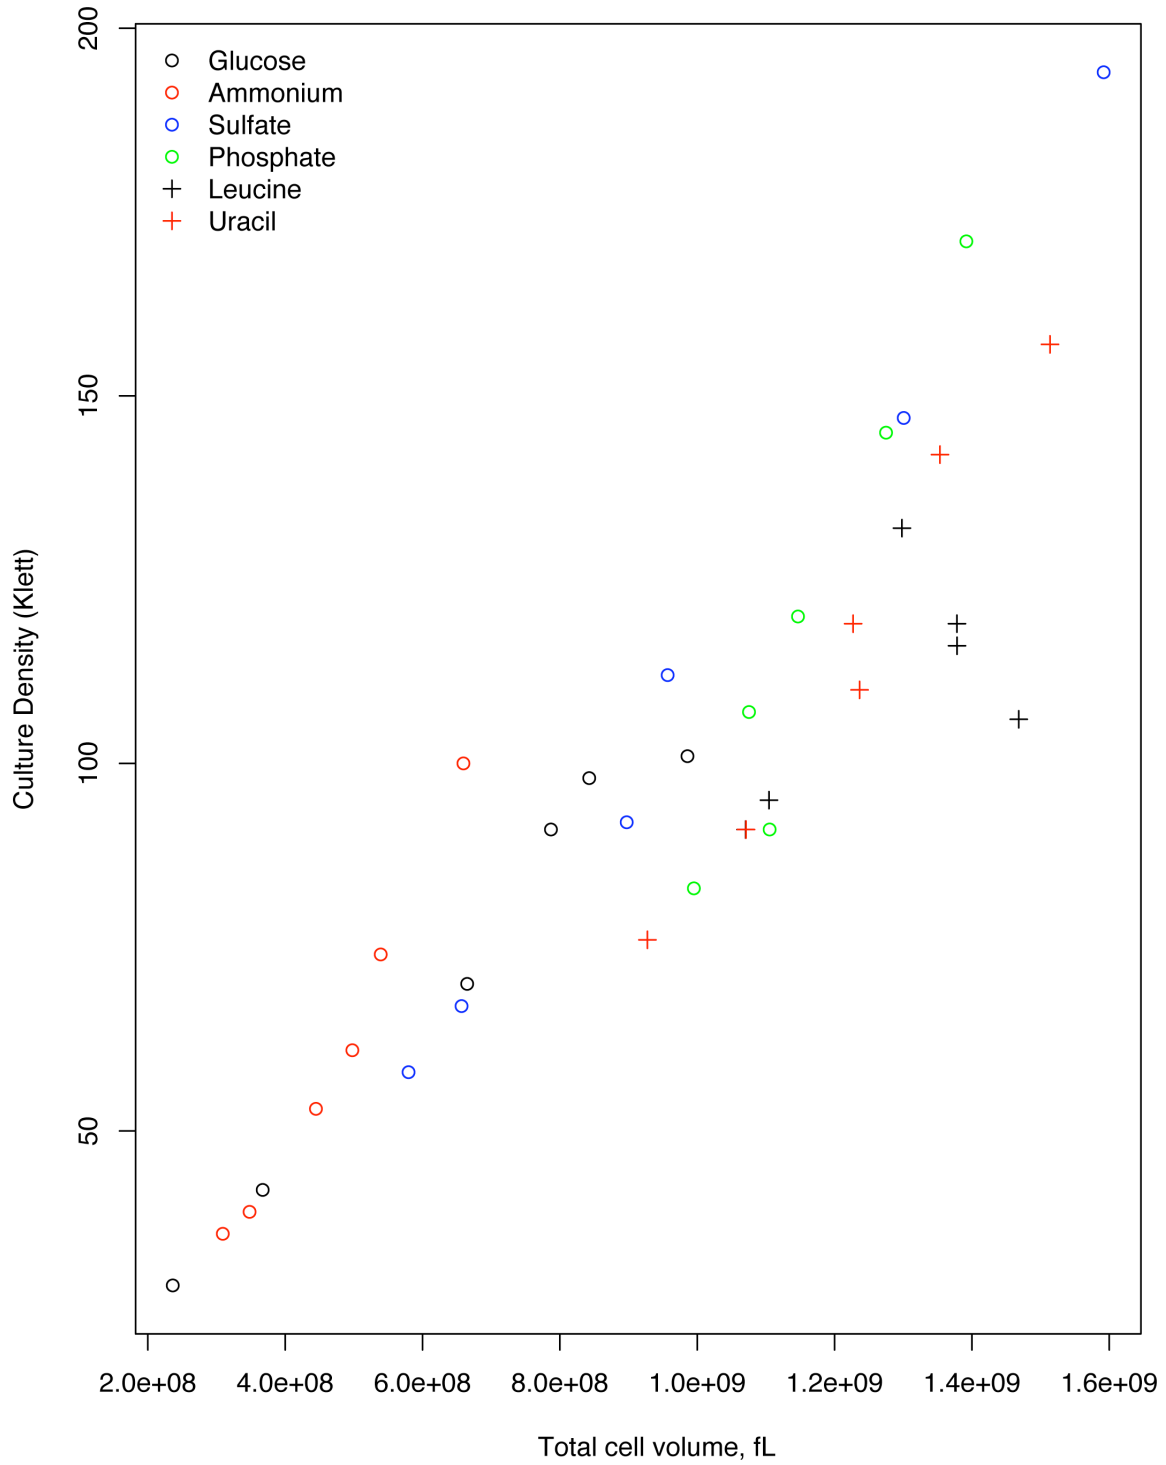

Supplement: mbc_E07-08-0779_3.pdf [file mbc_E07-08-0779_3.pdf]
