# Supplementary material
Source: PubMed Central journal article supplement (PMC2174172)

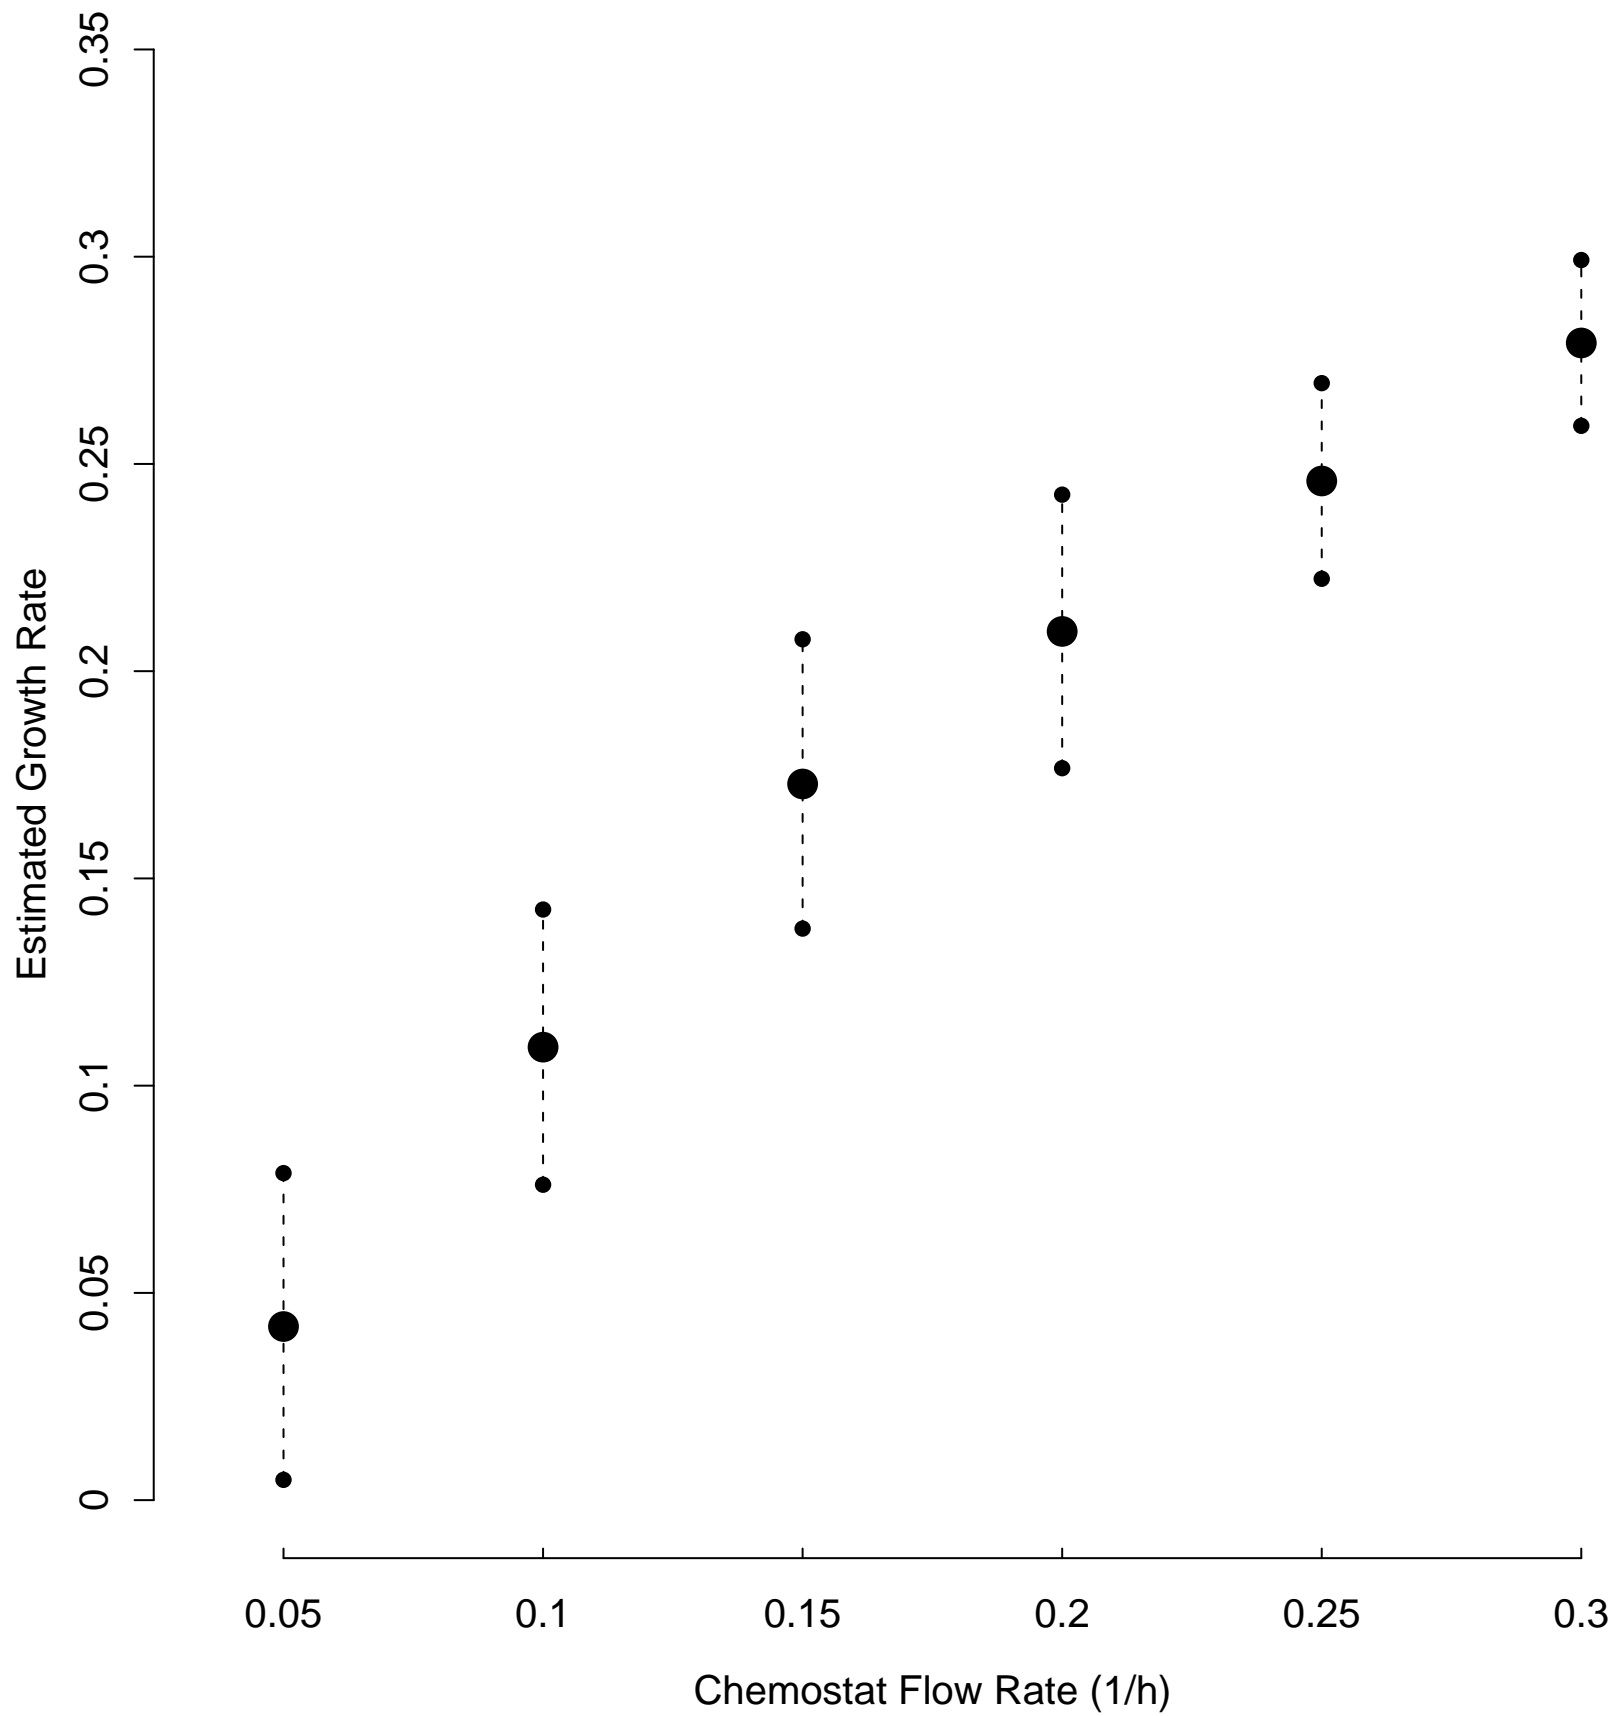

Supplement: mbc_E07-08-0779_5.pdf [file mbc_E07-08-0779_5.pdf]
